# Supplementary material for: Strong or Weak Handgrip? Normative Reference Values for the German Population across the Life Course Stratified by Sex, Age, and Body Height
Source: PubMed Central journal article supplement (PMC5049850; doi:10.1371/journal.pone.0163917), 2016-10-04
Supplement: pone.0163917.s001.pdf [file pone.0163917.s001.pdf]

**S1 Table. Overview of Prior Studies Providing Reference Values for Handgrip Strength.**

| Study                                                              | Geo                            | Ages                   | N participants                                            | Dataset                                                                                    | Measurement                                                                          | Representativeness                                                               | Stratification                     | Results                                                                                                                                                  |
|--------------------------------------------------------------------|--------------------------------|------------------------|-----------------------------------------------------------|--------------------------------------------------------------------------------------------|--------------------------------------------------------------------------------------|----------------------------------------------------------------------------------|------------------------------------|----------------------------------------------------------------------------------------------------------------------------------------------------------|
| <b><i>Panel A: Life course &amp; nationally representative</i></b> |                                |                        |                                                           |                                                                                            |                                                                                      |                                                                                  |                                    |                                                                                                                                                          |
| Dodds et al. (2014)                                                | Great Britain                  | 4-94                   | 49,964 participants; 60,803 observations                  | Values taken from 12 studies incl. <i>ELSA</i> and <i>UKHLS</i> , measurement in 1990-2012 | Varying type of dynamometer, mostly <i>Jamar</i> ; max. value taken from either hand | Values taken from variety of studies some of which are nationally representative | Sex and 5-year age groups          | Peak M men: 52 kg ages 30-39; women: 31 kg ages 25-44<br><br><u>Ages 65-69</u> M men: 42 kg (N=3,947); women: 25 kg (N=4,171)                            |
| Peterson & Krishnan (2015)                                         | USA                            | 6-80                   | 7,119 individuals able to perform testing with both hands | National Health and Nutrition Examination Study ( <i>NHANES</i> ) 2011/12                  | <i>Takei</i> digital dynamometer, T.K.K5401; max. value taken from either hand       | Yes, for non-institutionalized population                                        | Sex and unevenly spaced age groups | Peak MD men: 51 kg ages 25-30; women: 31 kg ages 20-40 (see Appendix Tab. 2)<br><br><u>Age 65</u> MD men: 42 kg; women: 27 kg (age-specific N unknown)   |
| Perna et al. (2015)                                                | USA                            | 6+ (oldest group 70+)  | 3,497 males & 3,400 females                               | National Health and Nutrition Examination Study ( <i>NHANES</i> ) 2011/12                  | <i>Takei</i> digital dynamometer, T.K.K5401; sum of 2 values taken from each hand    | Yes, for non-institutionalized population                                        | Sex and unevenly spaced age groups | Peak M men: 49 kg ages 30-39; women: 31 kg ages 30-39 (sum of grip from 2 hands / 2)<br><br><u>Ages 60-69</u> M men: 41 kg (N=373); women: 26 kg (N=354) |
| <b><i>Panel B: Life course, not nationally representative</i></b>  |                                |                        |                                                           |                                                                                            |                                                                                      |                                                                                  |                                    |                                                                                                                                                          |
| Peters et al. (2011)                                               | USA                            | 20-96                  | 720 healthy participants (e.g. no ADL restrictions)       | Convenience sample recruited from university, hospitals, elderly homes, sports clubs, etc. | <i>Jamar</i> dynamometer; max. value taken from either hand                          | No, convenience sample                                                           | Sex, 10-year age groups            | Peak MD men: 49 kg ages 40-49; women: 29 kg ages 30-39 (N=50)<br><u>Ages 60-69</u> MD men of 43 kg (N=58); women: 25 kg (N=49)                           |
| Massy-Westropp et al. (2011)                                       | North West Adelaide, Australia | 20+ (oldest group 70+) | 1,314 men & 1,315 women w/o hand pain or arthritis        | North West Adelaide Health Study                                                           | <i>Jamar</i> analogue dynamometer                                                    | Representative of community-based population of North West Adelaide              | Sex and 10-year age groups         | Peak M (R) men: 47 kg ages 20-49; women: 31 kg ages 30-39<br><u>Ages 60-69</u> M (R) men: 40 kg; women: 24 kg (N not provided)                           |

|                             |                             |                        |                                                                             |                                                                                                    |                                                                                                |                                                                    |                                    |                                                                                                                                    |
|-----------------------------|-----------------------------|------------------------|-----------------------------------------------------------------------------|----------------------------------------------------------------------------------------------------|------------------------------------------------------------------------------------------------|--------------------------------------------------------------------|------------------------------------|------------------------------------------------------------------------------------------------------------------------------------|
| Schlüssel et al. (2008)     | Rio de Janeiro, Brazil      | 20+ (oldest group 70+) | 1,122 men & 1,928 women                                                     | Nutrition, Physical Activity and Health Survey (PNAFS), 2003                                       | <i>Jamar</i> ; max. value taken from either hand                                               | Representative of adults living in Niteroi, Rio de Janeiro, Brasil | Sex and 10-year age groups         | Peak M (R) men: 47 kg ages 30-39; women: 28 kg ages 30-39<br><u>Ages 60-69</u> M (R) men: 37 kg (N=121); women: 22 kg (N=198)      |
| Nilsen et al. (2012)        | Norway                      | 20-94                  | 566 participants w/o heart conditions, inflammatory / neurological diseases | Convenience sample recruited from a variety of settings                                            | <i>Grippit</i> , electronic instrument, 1 trial with each hand                                 | No, convenience sample                                             | Sex and 10-year age groups         | Peak M (R) men: 58 kg ages 30-39; women: 34 kg ages 30-39<br><u>Ages 60-69</u> M (R) men 43 kg (N=22); women: 24 kg (N=38)         |
| Günther et al. (2008)       | Germany, region of Munich   | 20-95                  | 403 female & 366 male w/o inflammatory/neurological disease                 | Convenience sample recruited from different locations e.g., hospitals, sports clubs, elderly homes | Digital hydraulic dynamometer <i>NexGen</i> Ergonomics Inc., mean value from 3 trials per hand | No, convenience sample                                             | Sex and 10-year age groups         | Peak M (R) men: 54 kg ages 30-49; women: 33 kg ages 30-39 (N=70)<br><u>Ages 60-69</u> M (R) men: 45 kg (N=65); women: 26 kg (N=64) |
| Werle et al. (2009)         | Switzerland                 | 18-96                  | 496 men & 482 women; German-speaking population                             | Convenience sample recruited in shopping malls, schools, senior residences, etc.                   | <i>Jamar</i> dynamometer, separate values for dominant & non-dominant hand                     | No, convenience sample                                             | Sex, 5-year age groups             | Peak M (D) men: 56 kg ages 35-39; women: 36 kg ages 35-39 (N<50)<br><u>Ages 65-69</u> M (D) men: 43 kg(N=46); women: 30 kg (N=34)  |
| Luna-Heredia et al. (2005b) | Spain, 2 cities near Madrid | 17-97                  | 287 women & 229 men                                                         | Convenience sample recruited in a hospital (patients & visiting relatives)                         | 2 instruments: <i>Grip-D</i> & <i>BASELINE</i> dynamometer, max. value from each hand          | No, convenience sample                                             | Sex and 10-year age groups         | Peak M (D) men: 53 kg ages 30-49; women: 30 kg ages 30-49<br><u>Ages 60-69</u> M (D) men: 38 kg (N=41); women: 21 kg (N=24)        |
| Lauretani et al. (2003)     | Italy, Chianti region       | 20-102                 | 469 men & 561 women w/o neurological impairments                            | <i>InChianti</i> epidemiological study                                                             | Hand-held dynamometer                                                                          | Yes, for those living in Greve in Chianti & Bagno a Ripoli         | Sex and unevenly spaced age groups | Very small N except <u>ages 65-74</u> : M men: 39 kg (N=230); women: 22 kg (N=255)                                                 |

|                         |                                    |               |                                                         |                                                                                                   |                                                                               |                                                                        |                                                      |                                                                                                                                     |
|-------------------------|------------------------------------|---------------|---------------------------------------------------------|---------------------------------------------------------------------------------------------------|-------------------------------------------------------------------------------|------------------------------------------------------------------------|------------------------------------------------------|-------------------------------------------------------------------------------------------------------------------------------------|
| Bohannon et al. (2006)  | USA, Australia, Canada, UK, Sweden | 20+           | 1,840 women & 1,480 men                                 | Meta-analysis of 12 studies carried out in the 1990s and early 2000s                              | <i>Jamar</i> dynamometer; varying definitions means or max. of several trials | No, collection of convenience samples                                  | Sex, 5-year age groups                               | Peak M (R) men: 54 kg ages 40-44; women: 34 kg ages 25-34 and 45-49<br><u>Ages 60-69</u> M men: 42 kg (N=202); women: 26 kg (N=250) |
| <b>Panel C: Age 40+</b> |                                    |               |                                                         |                                                                                                   |                                                                               |                                                                        |                                                      |                                                                                                                                     |
| Kamide et al. (2015)    | Japan                              | 60+           | 5,216 men & 10,568 women from 97 sets                   | Meta-analysis of 33 studies, covering several regions                                             | <i>Smedley</i> -type dynamometer in 29 studies                                | Community-dwelling elderly who were independent in ADLs                | Sex and 3 specific ages (65, 75, and 85)             | <u>Age 65</u> regression-based estimated M men: 38 kg; women: 24 kg. <u>At age 75</u> men: 32 kg; women: 21 kg                      |
| Yoshimura et al. (2011) | Japan (regional)                   | 40+ (M:71.8)  | 826 men & 1,642 women, able to walk to test center      | <i>ROAD</i> study (Research on Osteoarthritis / Osteoporosis Against Disability)                  | <i>Toei Light</i> dynamometer, maximum value of either hand                   | Population-based cohorts in 3 communities                              | Sex and 10-year age groups                           | <u>Ages 60-69</u> M (D) men: 41 kg (N=137), women: 27 kg (N=316)                                                                    |
| Seino et al. (2014)     | Japan (regional)                   | 65+ (M: 74.0) | 2,097 men & 2,454 women                                 | 6 cohort studies collected 2002-2011, Tokyo Metropolitan Institute of Gerontology                 | <i>Smedley</i> -type dynamometer; Max. of 2 trials with D or 1 trial with ND  | Nondisabled, community-dwelling adults aged 65+ sampled from 5 regions | Sex and 5-year age groups                            | <u>Ages 65-69</u> M men: 35 kg (N=473); women: 23 kg (N=581). <u>Ages 70-74</u> men: 33 kg (N=699); women 21 kg (N=822)             |
| Ribom et al. (2011)     | Sweden (Uppsala)                   | 70-80         | 999 men, able to walk without aids                      | <i>MrOS</i> study, Uppsala cohort                                                                 | <i>Jamar</i> hydraulic dynamometer, max. of 2 trials in each hand             | Random selection of participants from the population registry          | Men only, for individual ages between ages 70 and 80 | <u>Ages 70-80</u> M (R) men: 41kg (N=999); at <u>ages 74&lt;76</u> 41 kg (N=191)                                                    |
| Bohannon et al. (2007)  | USA, Canada, Australia             | 75-99         | 270 men & 469 women                                     | Meta-analysis of 7 studies from 3 countries                                                       | <i>Jamar</i> dynamometer                                                      | No, convenience samples                                                | Sex and 4 age groups (75-79, 80-84, 85-89, 90-99)    | <u>Ages 75-79</u> M (R) men: 33 kg (N=114); women: 22 kg (N=207)                                                                    |
| Aoyagi et al. (2001)    | Japan & USA                        | 65+           | 163 Japanese; 9,403 US-Caucasian, 681 US-Japanese women | <i>Mitsugi Bone &amp; Joint Study; Hawaii Osteoporosis Study; Study of Osteoporotic Fractures</i> | <i>Jamar</i> hydraulic dynamometer, average value of 2 trials                 | No, regional data from rural farming area in Japan                     | Women, 5-year age groups, 3 different samples        | <u>Ages 65-69</u> M native Japanese: 25 kg (N=82); US-Japanese: 22 kg (N=112); Caucasians: 23kg (N=4,034)                           |

| <b>Panel D: Age 40+ with stratification by body height</b> |         |        |                                                                        |                                                                  |                                                                            |                                                                             |                                                                                              |                                                                                                                                                                                                          |
|------------------------------------------------------------|---------|--------|------------------------------------------------------------------------|------------------------------------------------------------------|----------------------------------------------------------------------------|-----------------------------------------------------------------------------|----------------------------------------------------------------------------------------------|----------------------------------------------------------------------------------------------------------------------------------------------------------------------------------------------------------|
| Spruit et al. (2013)                                       | UK      | 39-73  | 224,830 (R) persons w/o chronic conditions / obstructive lung function | <i>UK Biobank</i> : sample restricted to white ethnic background | <i>Jamar</i> hydraulic dynamometer                                         | Yes, for the healthy white population in this age group                     | Sex, 5-year age groups, 8 height groups                                                      | <u>Ages 60&lt;65</u> MD (R) men 170<180cm: 40 kg; women 165<170 cm: 25kg (un-specified large N for sub-groups)                                                                                           |
| Frederiksen et al. (2006)                                  | Denmark | 45-102 | 8,342 participants; 12,708 observations                                | 3 nationwide population-based surveys, 1998-2003                 | <i>Smedley</i> dynamometer (TTM, Tokio), max. value taken from either hand | Baseline studies were population-representative for particular age groups   | Sex, age group, and 7 height groups                                                          | <u>Age 65</u> M men: 42 kg if 170 cm tall and 45 kg if 180 cm tall; women: 25 kg if 160 cm tall and 27 kg if 170 cm tall                                                                                 |
| Kenny et al. (2013)                                        | Ireland | 50-85  | 5,819 participants (size of sub-samples not reported)                  | <i>TILDA</i> , sample w/o cognitive impairment, dementia         | <i>BASELINE</i> hydraulic dynamometer; maximum grip from either hand       | Yes, for older community dwelling Irish population w/o cognitive impairment | Sex, 5-year age groups, and 2 height groups (for men <173 cm/173+ cm; women <160 cm/160+ cm) | <u>Age 65</u> M men: 34 kg if <173 cm & 38 kg if 173+cm; women 20 kg if <160 cm & 23 kg if 173+ cm. <u>At age 75</u> M men 29 kg if <173 cm & 34 kg if 173+ cm; women 18 kg if <160 cm & 20 kg if 160+cm |

Review restricted to studies published after the year 2000 and excluding studies with very low participant numbers (e.g., Mitsionis et al. 2009). Values given in pounds (lbs) or Newton have been transformed into (whole) kilograms to allow for comparability. *Abbreviations*: D (dominant hand); M (mean values); MD (median values); N (no. of test participants); R (right hand), w/o (without)
