# Supplementary material for: Strong or Weak Handgrip? Normative Reference Values for the German Population across the Life Course Stratified by Sex, Age, and Body Height
Source: PubMed Central journal article supplement (PMC5049850; doi:10.1371/journal.pone.0163917), 2016-10-04
Supplement: pone.0163917.s002.pdf [file pone.0163917.s002.pdf]

**S2 Table. Overview of Sample Sizes by Survey Year and Sex.**

|                    | <i>2006</i> | <i>2008</i> | <i>2010</i> | <i>2012</i> | <i>2014</i> | <i>All years</i> |
|--------------------|-------------|-------------|-------------|-------------|-------------|------------------|
| Age range          | 17-90       | 17-90       | 17-90       | 17-90       | 17-90       | 17-90            |
| HGS range          | 10.0-79.0   | 10.5-80.0   | 10.0-80.0   | 10.0-80.0   | 10.0-79.0   | 10.0-80.0        |
| Height range men   | 160-200     | 160-200     | 160-200     | 160-200     | 160-200     | 160-200          |
| Height range women | 150-184     | 150-184     | 150-183     | 150-184     | 150-184     | 150-184          |
| N men              | 2,155       | 2,286       | 2,059       | 2,475       | 3,190       | 12,165           |
| N women            | 2,348       | 2,405       | 2,185       | 2,681       | 3,501       | 13,120           |
| N                  | 4,503       | 4,691       | 4,244       | 5,156       | 6,691       | 25,285           |

*Sample:* SOEP 2006-2014, HGS test participants, excluding those with HGS < 10 kg, those scoring in the lowest 5% of the PCS, and outliers identified from regressions of HGS on age, age2, height, and height2.
