# Supplementary material for: Strong or Weak Handgrip? Normative Reference Values for the German Population across the Life Course Stratified by Sex, Age, and Body Height
Source: PubMed Central journal article supplement (PMC5049850; doi:10.1371/journal.pone.0163917), 2016-10-04
Supplement: pone.0163917.s003.pdf [file pone.0163917.s003.pdf]

**S3 Table. Mean and Median Values for HGS by Age, Weighted.**

| Age   | Female       |     |             |      | Male         |     |             |       |
|-------|--------------|-----|-------------|------|--------------|-----|-------------|-------|
|       | Mean (kg)    | SD  | P50         | N    | Mean (kg)    | SD  | P50         | N     |
| 17-19 | 31.5         | 6.2 | 31.4        | 526  | 48.3         | 9.6 | 48.5        | 538   |
| 20-24 | 32.5         | 5.4 | 32.0        | 799  | 50.7         | 8.2 | 50.5        | 782   |
| 25-29 | 33.6         | 5.6 | 33.5        | 809  | 52.4         | 8.3 | 52.0        | 710   |
| 30-34 | 33.3         | 5.8 | 33.0        | 942  | 53.6*        | 8.2 | 53.0        | 730   |
| 35-39 | 34.2*        | 6.2 | 34.0        | 1144 | 53.4*        | 9.8 | 52.5        | 924   |
| 40-44 | <b>34.5*</b> | 6.3 | <b>34.5</b> | 1357 | <b>53.8*</b> | 9.3 | <b>54.0</b> | 1,172 |
| 45-49 | 33.4         | 6.1 | 33.0        | 1372 | 52.9*        | 8.4 | 53.0        | 1,294 |
| 50-54 | 32.2         | 5.9 | 32.0        | 1291 | 50.4         | 8.4 | 50.5        | 1,189 |
| 55-59 | 30.0         | 5.5 | 30.0        | 1092 | 49.1         | 8.5 | 49.0        | 1,010 |
| 60-64 | 29.0         | 5.3 | 29.0        | 1004 | 46.3         | 8.4 | 46.5        | 950   |
| 65-69 | 27.6         | 5.2 | 28.0        | 947  | 44.1         | 7.3 | 44.0        | 1,019 |
| 70-74 | 26.0         | 4.9 | 26.0        | 895  | 41.7         | 7.6 | 42.0        | 915   |
| 75-79 | 24.2         | 4.5 | 24.0        | 522  | 37.8         | 7.9 | 38.0        | 582   |
| 80-90 | 21.4         | 4.1 | 21.0        | 420  | 33.2         | 7.5 | 33.0        | 350   |

Notes: N = 13,120 women; 12,165 men. Table presents weighted means and standard deviations (SD) and median values (P50). The presented values are not standardized for height (for information of mean height by sex and age, see Table S4. \*denotes that the two/four values marked with a \* show no statistically significant difference.
