# Supplementary material for: Strong or Weak Handgrip? Normative Reference Values for the German Population across the Life Course Stratified by Sex, Age, and Body Height
Source: PubMed Central journal article supplement (PMC5049850; doi:10.1371/journal.pone.0163917), 2016-10-04
Supplement: pone.0163917.s004.pdf [file pone.0163917.s004.pdf]

**S4 Table. Mean Body Height in Centimetres by Age, Weighted.**

| Age   | Female    |     |      | Male      |     |      |
|-------|-----------|-----|------|-----------|-----|------|
|       | Mean (cm) | SD  | N    | Mean (cm) | SD  | N    |
| 17-19 | 167.1     | 7.4 | 526  | 181.1     | 7.8 | 538  |
| 20-24 | 167.5     | 6.2 | 799  | 181.3     | 6.8 | 782  |
| 25-29 | 167.3     | 6.5 | 809  | 180.5     | 6.7 | 710  |
| 30-34 | 167.0     | 6.9 | 942  | 179.9     | 6.8 | 730  |
| 35-39 | 166.4     | 7.4 | 1144 | 179.2     | 7.6 | 924  |
| 40-44 | 166.7     | 6.9 | 1357 | 179.8     | 7.4 | 1172 |
| 45-49 | 166.3     | 6.7 | 1372 | 178.8     | 7.0 | 1294 |
| 50-54 | 165.3     | 6.4 | 1291 | 178.0     | 6.5 | 1189 |
| 55-59 | 164.6     | 6.1 | 1092 | 177.4     | 7.0 | 1010 |
| 60-64 | 163.9     | 5.7 | 1004 | 176.0     | 6.6 | 950  |
| 65-69 | 163.1     | 5.8 | 947  | 175.4     | 5.9 | 1019 |
| 70-74 | 163.3     | 5.4 | 895  | 174.4     | 6.0 | 915  |
| 75-79 | 162.5     | 4.9 | 522  | 173.8     | 5.8 | 582  |
| 80-90 | 161.2     | 4.2 | 420  | 172.5     | 5.2 | 350  |

Notes: Overall sample size N = 13,120 women; 12,165 men.
